# Supplementary material for: Clinically useful limited sampling strategy to estimate area under the concentration-time curve of once-daily tacrolimus in adult Japanese kidney transplant recipients
Source: PubMed Central journal article supplement (PMC6905578; doi:10.1371/journal.pone.0225878), 2019-12-11
Supplement: pone.0225878.s001.pdf [file pone.0225878.s001.pdf]

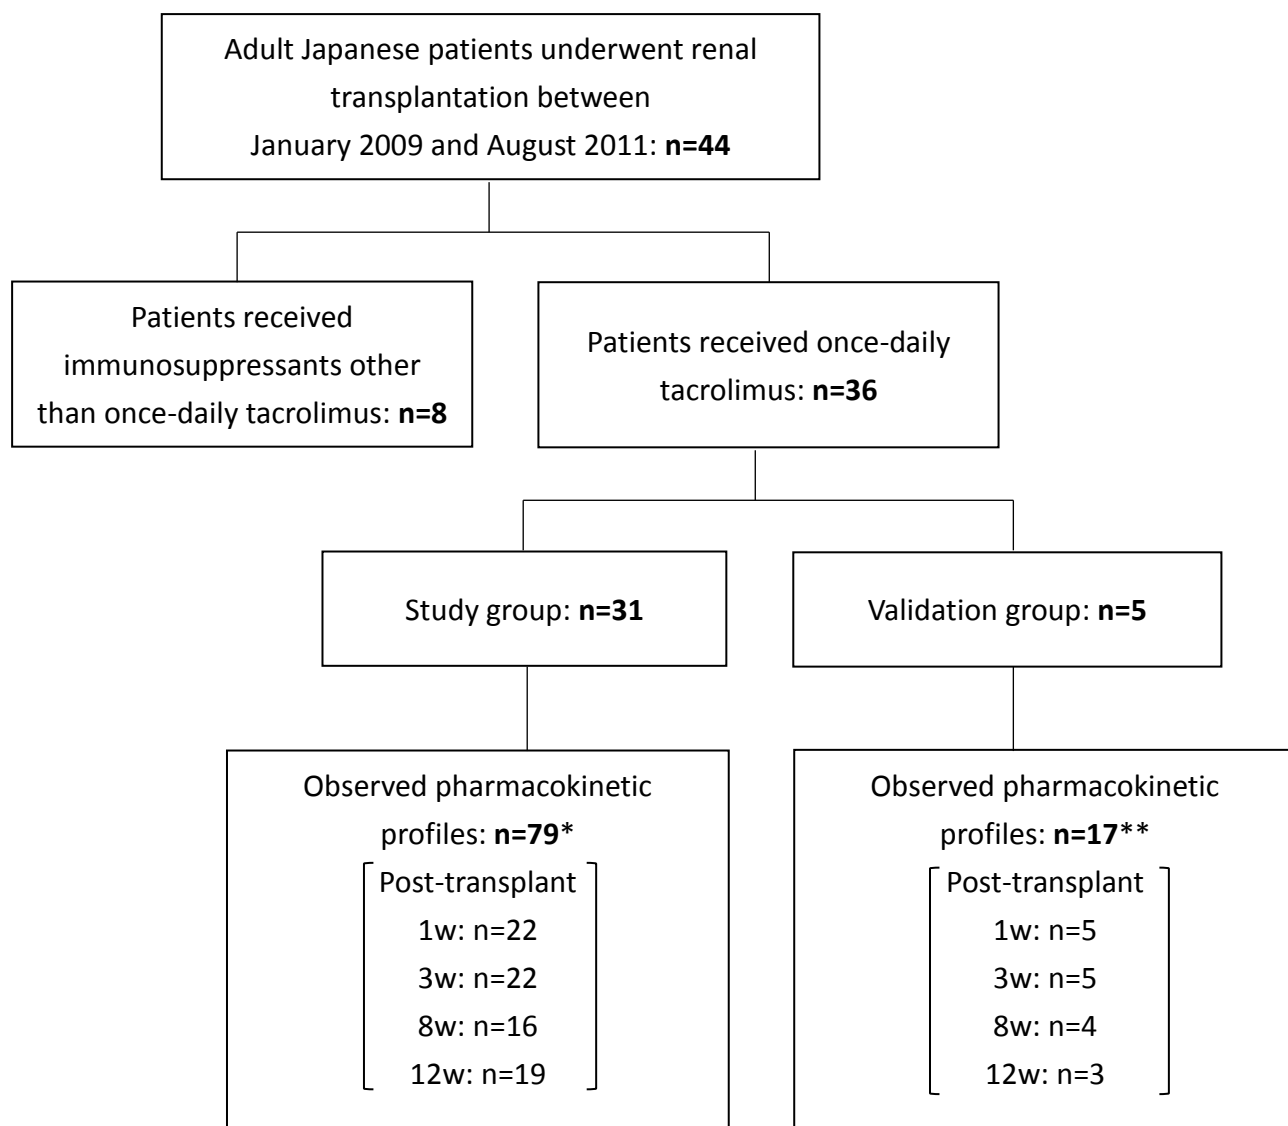

\*Of 124 (31x4), 79 (57.3%) pharmacokinetic profiles were available.

\*\*Of 20 (5x4), 17 (85.0%) pharmacokinetic profiles were available.
