# Supplementary material for: Clinically useful limited sampling strategy to estimate area under the concentration-time curve of once-daily tacrolimus in adult Japanese kidney transplant recipients
Source: PubMed Central journal article supplement (PMC6905578; doi:10.1371/journal.pone.0225878), 2019-12-11

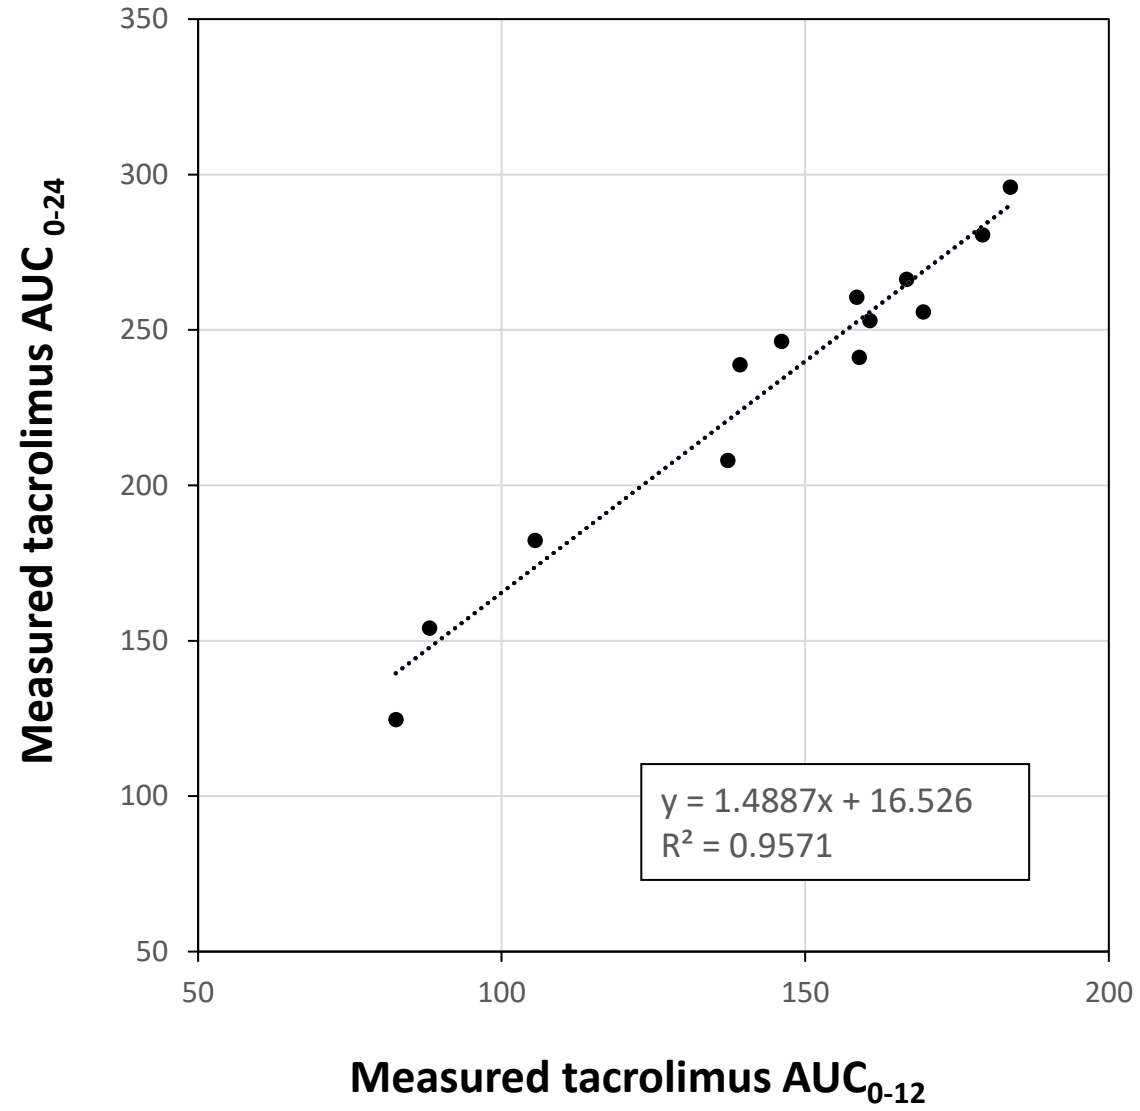

Supplement: pone.0225878.s003.pdf [file pone.0225878.s003.pdf]
